# Supplementary material
Source: publisher site journal article supplement (https://www.dovepress.com/article/386774)

**Supplementary Table 1. Comparison of EEG power values between the NT and ADHD subtypes (Group A)**

| Significant EEG power band | Lobe | Mean (G1) | Std (G1) | Mean (G2) | Std (G2) | p-value | Statistical Test |
| --- | --- | --- | --- | --- | --- | --- | --- |
| Rel. power – Beta 2 band | Temporal | 3.465 | 2.3009 | 3.622 | 0.7660 | 0.0313 | Mann-Whitney U test |
| Rel. power – Beta 3 band | Temporal | 3.107 | 3.1718 | 3.335 | 0.9330 | 0.0172 | Mann-Whitney U test |

**Abbreviations:** NT, neurotypical; ADHD, Attention-Deficit/Hyperactivity Disorder

**Supplementary Table 2. Comparison of EEG power values between the NT and ADHD subtypes (Group B)**

| Significant EEG power band | Lobe | Mean (G1) | Std (G1) | Mean (G2) | Std (G2) | p-value | Statistical Test |
| --- | --- | --- | --- | --- | --- | --- | --- |
| Abs. power – Delta band | Frontal | 24.747 | 10.7494 | 36.345 | 13.7804 | 0.0055 | Independent T-test |
| Temporal | 26.894 | 109743 | 49.172 | 23.1531 | 0.0050 | Independent T-test |
| Parietal | 26.285 | 9.5266 | 44.247 | 20.3074 | 0.0086 | Independent T-test |
| Occipital | 72.864 | 36.5124 | 156.874 | 92.0821 | 0.0069 | Independent T-test |
| Abs. power – Theta band | Frontal | 18.446 | 14.2018 | 30.018 | 16.0437 | 0.0250 | Independent T-test |
| Central | 22.126 | 12.4370 | 31.897 | 14.0575 | 0.0304 | Independent T-test |
| Temporal | 24.792 | 19.0599 | 44.432 | 28.1349 | 0.0352 | Independent T-test |
| Parietal | 25.603 | 18.5753 | 53.111 | 35.1322 | 0.0395 | Mann-Whitney U test |
| Occipital | 50.854 | 27.6354 | 111.486 | 69.9756 | 0.0094 | Independent T-test |
| Rel.power – Alpha 2 band | Frontal | 9.165 | 7.1543 | 5.623 | 2.2899 | 0.0232 | Independent T-test |
| Temporal | 10.002 | 7.1641 | 6.461 | 3.2224 | 0.0351 | Independent T-test |

**Abbreviations:** NT, neurotypical; ADHD, Attention-Deficit/Hyperactivity Disorder

**Supplementary Table 3. Comparison of EEG power values between the NT and ADHD subtypes (Group C)**

| Significant EEG power band | Lobe | Mean (G1) | Std (G1) | Mean (G2) | Std (G2) | p-value | Statistical Test |
| --- | --- | --- | --- | --- | --- | --- | --- |
| Abs. power – Beta 2 band | Frontal | 1.773 | 0.5646 | 3.326 | 2.6068 | 0.0320 | Independent T-test |
| Central | 2.086 | 0.7430 | 3.227 | 1.9133 | 0.0346 | Independent T-test |
| Temporal | 2.725 | 0.9578 | 4.562 | 2.4606 | 0.0104 | Independent T-test |
| Occipital | 6.743 | 2.9154 | 10.033 | 3.7577 | 0.0023 | Independent T-test |
| Abs. power – Beta 3 band | Central | 1.770 | 0.8231 | 3.170 | 2.2915 | 0.0053 | Independent T-test |
| Temporal | 2.078 | 0.6459 | 3.722 | 1.8366 | 0.0030 | Independent T-test |
| Occipital | 4.150 | 1.7478 | 5.996 | 2.8633 | 0.0109 | Independent T-test |
| Rel. power-Beta 2 band | Frontal | 3.059 | 2.2575 | 4.449 | 2.4657 | 0.0048 | Mann-Whitney U Test |
| Central | 3.224 | 2.7090 | 4.104 | 2.0737 | 0.0290 | Mann-Whitney U Test |
| Temporal | 3.465 | 2.3009 | 4.646 | 2.6450 | 0.0211 | Mann-Whitney U Test |
| Rel. power-Beta 3 band | Frontal | 3.378 | 3.8085 | 5.089 | 4.0635 | 0.0045 | Mann-Whitney U Test |
| Central | 3.030 | 4.1065 | 4.009 | 2.2732 | 0.0019 | Mann-Whitney U Test |
| Temporal | 3.107 | 3.1718 | 4.042 | 2.0877 | 0.0036 | Mann-Whitney U Test |

**Abbreviations:** NT, neurotypical; ADHD, Attention-Deficit/Hyperactivity Disorder

**Supplementary figure legends**

**Supplementary figure 1.** Results of LDA clustering analysis for the ADHD subtype

**Abbreviations:** LDA, Linear Discriminant Analysis; ADHD, Attention-Deficit/Hyperactivity Disorder


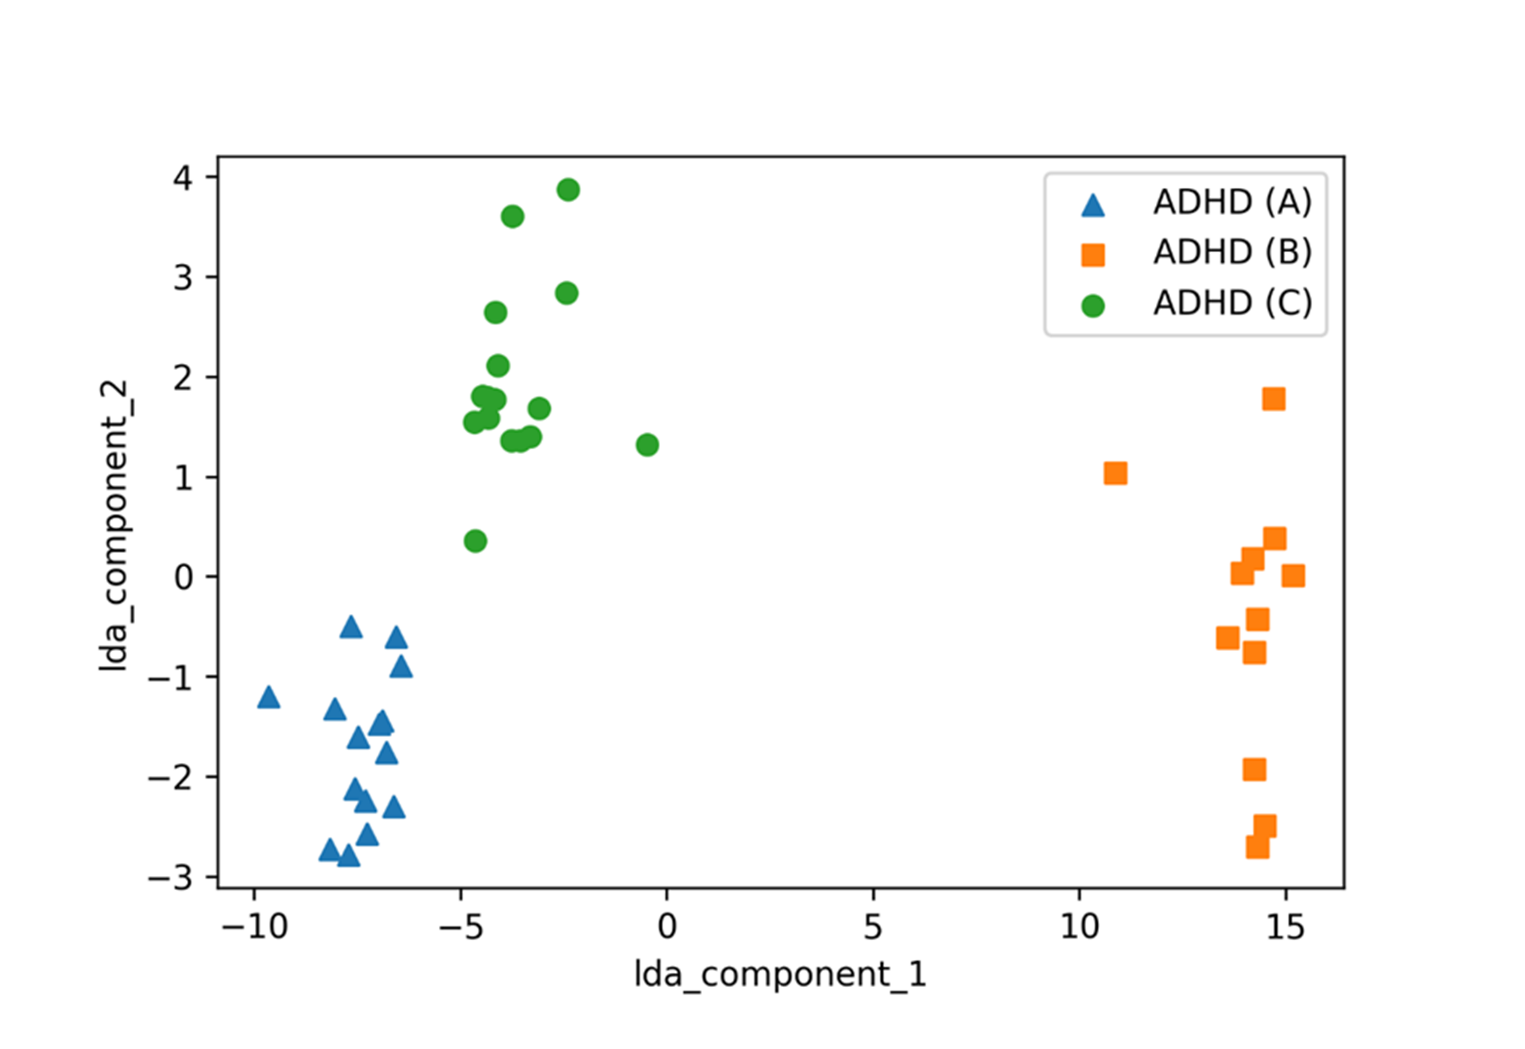


**Supplementary figure 2.** Topographical maps of absolute power for each ADHD subgroups and NT group.

**Notes:** The topography denotes the topographical distribution of z-score. Red color represents higher value; blue color represents lower value.

**Abbreviations:** ADHD, attention-deficit/hyperactivity disorder; NT, neurotypical


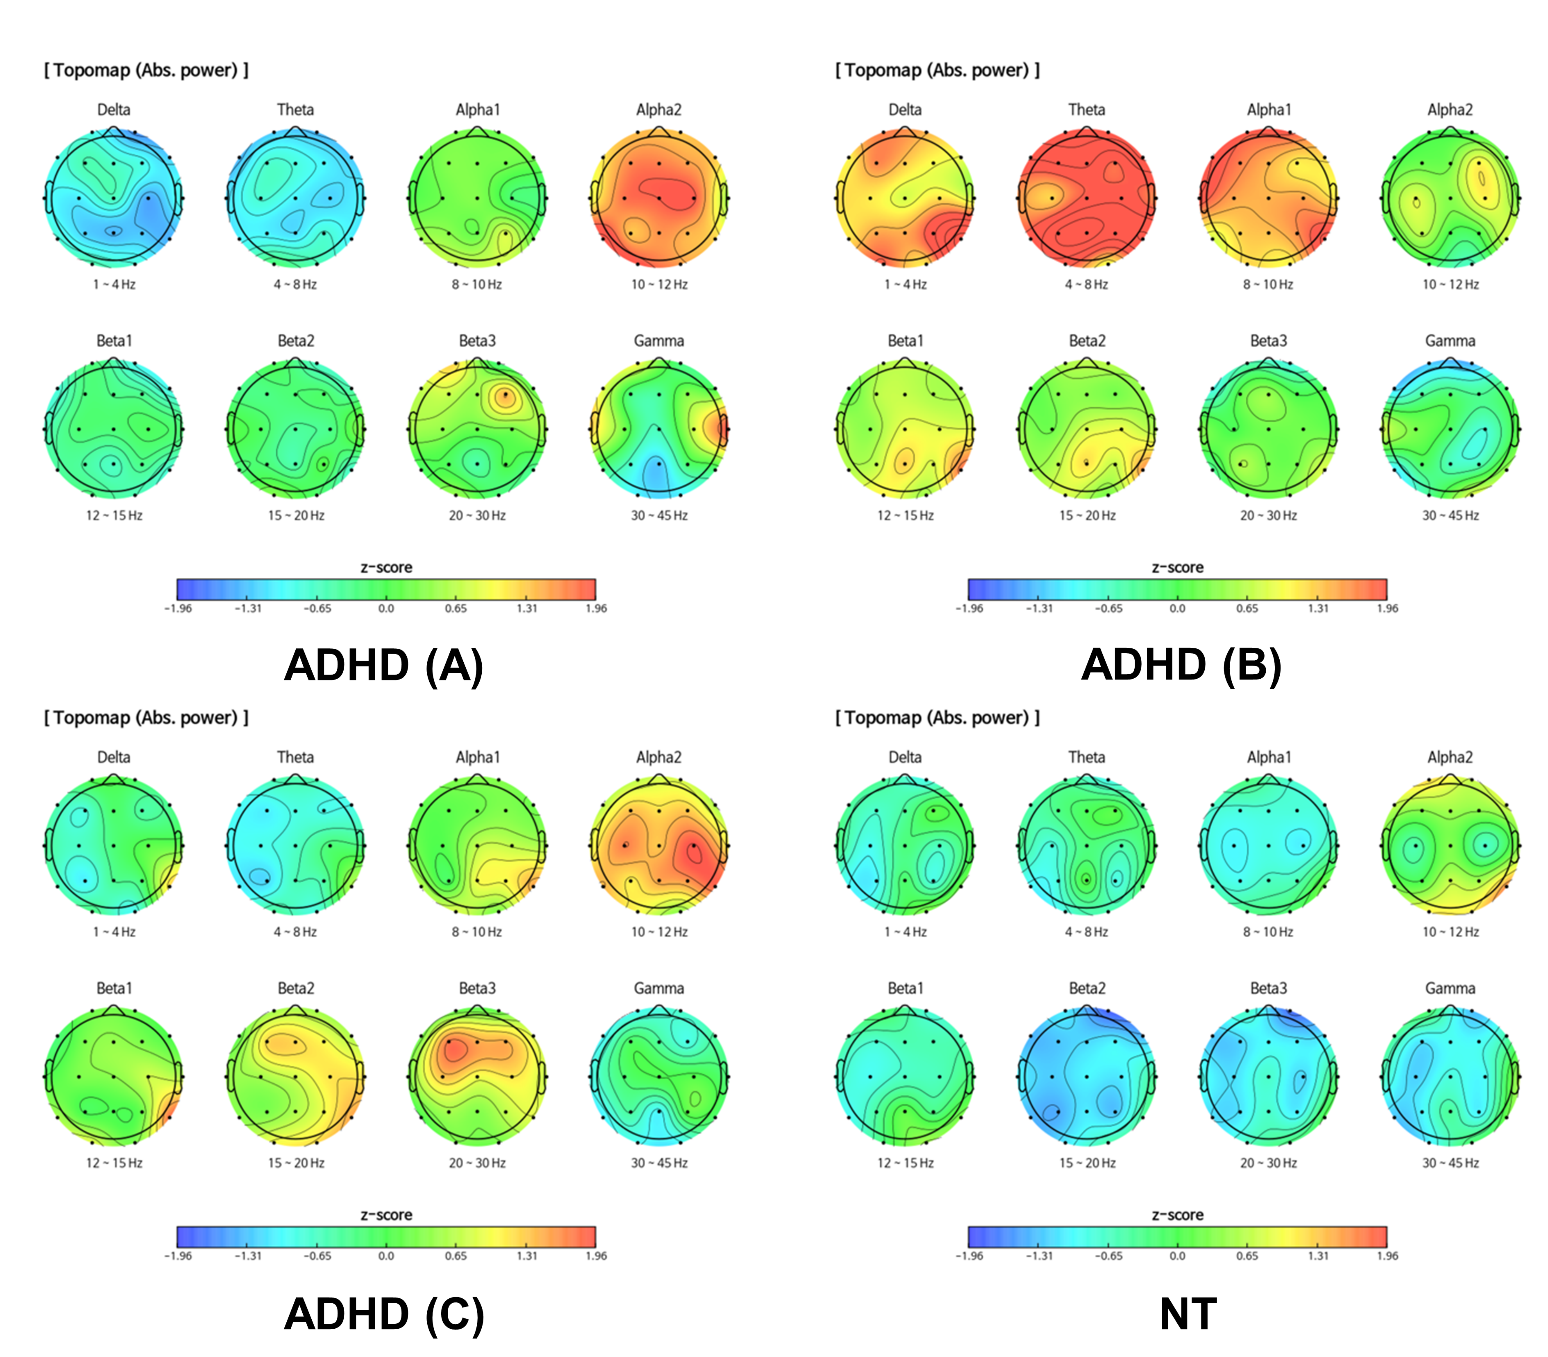

Supplement: Supplementary file 1 [file get_supplementary_file.php]
